1 Association between schizophrenia and both loss of function and missense mutations  
2 in paralog conserved sites of voltage-gated sodium channels

3

4 Elliott Rees<sup>1</sup>, Noa Carrera<sup>1</sup>, Joanne Morgan<sup>1</sup>, Kirsty Hambridge<sup>1</sup>, Valentina Escott-  
5 Price<sup>1</sup>, Andrew J. Pocklington<sup>1</sup>, Alexander L. Richards<sup>1</sup>, Antonio F. Pardiñas<sup>1</sup>,  
6 GROUP Investigators<sup>+</sup>, Colm McDonald<sup>2</sup>, Gary Donohoe<sup>2</sup>, Derek W Morris<sup>2</sup>, Elaine  
7 Kenny<sup>3</sup>, Eric Kelleher<sup>3</sup>, Michael Gill<sup>3</sup>, Aiden Corvin<sup>3</sup>, George Kirov<sup>1</sup>, James T. R.  
8 Walters<sup>1</sup>, Peter Holmans<sup>1</sup>, Michael J. Owen<sup>1\*</sup>, Michael C. O'Donovan<sup>1\*</sup>

9

- 10 1. MRC Centre for Neuropsychiatric Genetics and Genomics, Division of  
11 Psychological Medicine and Clinical Neurosciences, School of Medicine,  
12 Cardiff University, Cardiff, UK
- 13 2. Centre for Neuroimaging and Cognitive Genomics (NICOG), National  
14 University of Ireland Galway, Galway, Ireland
- 15 3. Department of Psychiatry & Trinity Translational Medicine Institute, Trinity  
16 College Dublin, Dublin, Ireland

17

18 <sup>+</sup>Membership for GROUP Investigators is provided in the acknowledgments.

19 <sup>\*</sup>Corresponding authors:

20 Michael J. Owen (OwenMJ@cardiff.ac.uk)

21 Michael C. O'Donovan (ODonovanMC@cardiff.ac.uk)

22

23

## Abstract

Sequencing studies have highlighted candidate sets of genes involved in schizophrenia, including activity-regulated cytoskeleton-associated protein (ARC) and N-methyl-d-aspartate receptor (NMDAR) complexes. Two genes, *SETD1A* and *RBM12*, have also been associated with robust statistical evidence. Larger samples and novel methods for identifying disease-associated missense variants are needed to reveal novel genes and biological mechanisms associated with schizophrenia. We sequenced 187 genes, selected for prior evidence of association with schizophrenia, in a new dataset of 5,207 cases and 4,991 controls. Included were members of ARC and NMDAR post-synaptic protein complexes, as well as voltage-gated sodium and calcium channels. We observed a significant case excess of rare ( $<0.1\%$  in frequency) loss-of-function (LoF) mutations across all 187 genes ( $OR = 1.36$ ;  $P_{corrected} = 0.0072$ ) but no individual gene was associated with schizophrenia after correcting for multiple testing. We found novel evidence that LoF and missense variants at paralog conserved sites were enriched in sodium channels ( $OR = 1.26$ ;  $P = 0.0035$ ). Meta-analysis of our new data with published sequencing data (11,319 cases, 15,854 controls and 1,136 trios) supported and refined this association to sodium channel alpha subunits ( $P = 0.0029$ ). Meta-analysis also confirmed association between schizophrenia and rare variants in ARC ( $P = 4.0 \times 10^{-4}$ ) and NMDAR ( $P = 1.7 \times 10^{-5}$ ) synaptic genes. No association was found between rare variants in calcium channels and schizophrenia.

In one of the largest sequencing studies of schizophrenia to date, we provide novel evidence that multiple voltage-gated sodium channels are involved in schizophrenia pathogenesis, and increase the evidence for association between rare

48 variants in ARC and NMDAR post-synaptic complexes and schizophrenia. Larger  
49 samples are required to identify specific genes and variants driving these associations.

50

## 51 **Author Summary**

52

53 Common and rare genetic variations are known to play a substantial role in the  
54 development of schizophrenia. Recently, sequencing studies have started to highlight  
55 specific sets of genes that are enriched for rare variation in schizophrenia, such as the  
56 synaptic gene sets ARC and NMDAR, as well as voltage-gated sodium and calcium  
57 channels. To confirm the role of these gene sets in schizophrenia, and identify specific  
58 risk genes, we sequenced 187 genes in a new sample of 5,207 schizophrenia cases and  
59 4,991 controls. We find an excess of protein truncating mutations with a frequency  
60  $<0.1\%$  in all 187 targeted genes, and provide novel evidence that mutations altering  
61 amino acids conserved across sodium channel proteins are risk factors for  
62 schizophrenia. Through meta-analysing our new data with previously published  
63 sequencing data sets, for a total of 11,319 cases, 15,854 controls and 1,136 trios, we  
64 increase the evidence for association between rare coding variants and schizophrenia  
65 in voltage-gated sodium channels, as well as in synaptic gene sets ARC and NMDAR.  
66 Although no individual gene was associated with schizophrenia, these findings  
67 suggest larger studies will identify the specific genes driving these associations.

68

## 69 **Introduction**

70

71 Schizophrenia is a highly heritable polygenic disorder [1]. Collectively, common  
72 alleles contribute up to half of the genetic variance in schizophrenia liability [2, 3],

73 and 145 distinct loci have currently been associated with the disorder at genome-wide  
74 levels of significance in the most recent genome-wide association study [4].  
75 Schizophrenia risk is also conferred by rare mutations including copy number variants  
76 (CNVs) [5, 6] and rare coding variants (RCVs) [7, 8], each of which sometimes occur  
77 as *de novo* mutations [9, 10].

78 Studies of RCVs have the potential to inform schizophrenia pathogenesis  
79 since they can pinpoint specific functional variants in individual genes. However, to  
80 date, only two genes, *SETD1A* [11] and *RBM12* [12], have been strongly implicated.  
81 A major limiting factor, as for studies of common variants, is that for complex  
82 disorders, large samples are generally required to obtain robust results in case-control  
83 [13] studies. To date, the largest published sequencing studies of schizophrenia have  
84 involved around 5,000 cases, 9,000 controls and 1,000 parent-proband trios [7, 11],  
85 which are an order of magnitude smaller than recently published schizophrenia SNP  
86 genotyping studies of common risk alleles (e.g. 40,675 cases and 64,643 controls [4]).  
87 Nevertheless, whole exome sequencing studies have provided important clues to the  
88 pathophysiology of schizophrenia. For example, proband-parent trio based studies  
89 have shown *de novo* RCVs to be significantly enriched among glutamatergic post-  
90 synaptic proteins, in particular, the activity-regulated cytoskeleton-associated protein  
91 (ARC) and N-methyl-d-aspartate receptor (NMDAR) complexes [9]. These synaptic  
92 gene sets, first associated with schizophrenia through studies of *de novo* CNVs [10],  
93 have also shown evidence for association in independent case-control CNV [14] and  
94 sequencing datasets [7, 15]. More recently, in an extension of the Swedish sample  
95 used by Purcell *et al* 2014 [15], the authors documented an elevated exome-wide  
96 burden of ultra-rare, protein disruptive alleles, which was concentrated among 3,388  
97 neuron-specific genes, particularly those that are expressed at synapses, including the

98 ARC and NMDAR complexes [7]. Additionally, the enrichment of RCVs in  
99 schizophrenia has been shown to be concentrated among 3,488 genes that are depleted  
100 for loss-of-function (LoF) mutation in large population cohorts [16, 17].

101 In the current study, we performed targeted sequencing of 187 genes, selected  
102 for prior evidence for association with schizophrenia (Table S1), in 5,207 cases and  
103 4,991 controls, none of which have contributed to previous schizophrenia sequencing  
104 studies. Among these targeted genes, we had complete membership of 4 gene sets,  
105 each of which has been postulated to be implicated in schizophrenia through rare  
106 variant analysis [7, 9, 10, 15, 18]; ARC and NMDAR post-synaptic protein  
107 complexes [9, 10], and voltage-gated sodium [18] and calcium channels [15].  
108 Multiple voltage-gated calcium channels have also been strongly implicated through  
109 common variant studies [19]. Our primary aims were to a) investigate association  
110 between schizophrenia and RCVs in these gene sets, and b) identify individual genes  
111 that might drive the gene set associations. The remainder of the genes targeted for  
112 sequencing were selected on the basis of supportive evidence from at least two  
113 sources (see methods).

114 Most recent studies of RCVs in schizophrenia have focused on LoF alleles.  
115 However, it is clear that missense alleles also contribute to schizophrenia risk [7, 9],  
116 but in contrast to LoF alleles, *in silico* methods cannot distinguish at high sensitivity  
117 and specificity between missense alleles that alter the function of the encoded protein  
118 and those that are benign. Recently, it has been shown that restricting analyses to  
119 missense variants affecting amino-acids that are conserved within paralogous gene  
120 families improves power for identifying pathogenic alleles [20]. Given that two of our  
121 targeted gene sets consist of paralogous gene families (voltage-gated sodium and

122 calcium channels), we exploited this approach to analyse missense variants that are  
123 more likely to have an adverse effect on protein function [20].

124 Finally, to maximise power, we combined the new sequencing data with  
125 independent, published schizophrenia case-control (Swedish [7] and UK10K [11]  
126 datasets) and trio exome-sequencing data (see methods), yielding a combined analysis  
127 of RCVs in a total of 11,319 cases, 15,854 controls and 1,136 trios.

128

## 129 **Results**

130

### 131 Mutation burden

132 In the targeted sequence sample, we performed six primary tests of mutation burden  
133 across all 187 targeted genes: LoF, nonsynonymous damaging and nonsynonymous  
134 variants, each under two allele frequency thresholds;  $< 0.1\%$  and singletons. A  
135 significant ( $P_{corrected} < 0.05$ ) excess of LoF mutations ( $< 0.1\%$  in frequency) was  
136 observed in cases (Table 1), who had a mean excess of 0.013 LoF mutations per  
137 person across the 187 targeted genes (Supplementary Table S2). There was no  
138 significant difference in the rate of any other class of allele (Table 1). Although not  
139 part of our primary analysis, we note no difference between cases and controls in the  
140 rate of synonymous mutations (frequency  $< 0.1\%$ ) (OR (95% CI) = 1.02 (0.94-1.08);  $P$   
141 = 1), suggesting the enrichment of LoF mutations in cases is unlikely to be due to  
142 technical artefacts.

143

144

145

146

147 **Table 1.** Mutation burden in 187 targeted gene

| Mut.<br>Type | MAF < 0.1%                 |                  |               |                     |               |                     | Singletons                 |                  |          |                     |               |                     |
|--------------|----------------------------|------------------|---------------|---------------------|---------------|---------------------|----------------------------|------------------|----------|---------------------|---------------|---------------------|
|              | Targeted sequencing sample |                  |               |                     | Meta-analysis |                     | Targeted sequencing sample |                  |          |                     | Meta-analysis |                     |
|              | N mut.<br>Case/Con         | Rate<br>Case/Con | <i>P</i>      | OR<br>(95% CI)      | <i>P</i>      | OR<br>(95% CI)      | N mut.<br>Case/Con         | Rate<br>Case/Con | <i>P</i> | OR<br>(95% CI)      | <i>P</i>      | OR<br>(95% CI)      |
| LoF          | 271/195                    | 0.052/0.039      | <b>0.0012</b> | 1.36<br>(1.13-1.64) | 0.00035       | 1.22<br>(1.1-1.37)  | 94/66                      | 0.018/0.013      | 0.047    | 1.38<br>(1-1.9)     | 0.0043        | 1.31<br>(1.09-1.57) |
| NSD          | 5,854/5,425                | 1.12/1.09        | 0.083         | 1.03<br>(1.00-1.07) | 0.93          | 1.00<br>(0.98-1.03) | 1,268/1,223                | 0.24/0.25        | 0.94     | 1.00<br>(0.92-1.08) | 0.98          | 1.00<br>(0.95-1.06) |
| NS           | 9,199/8,625                | 1.77/1.73        | 0.14          | 1.02<br>(0.99-1.05) | 0.85          | 1.00<br>(0.98-1.02) | 1,878/1,845                | 0.36/0.37        | 0.56     | 0.98<br>(0.92-1.05) | 0.38          | 0.98<br>(0.94-1.02) |

148 Targeted sequencing sample includes data from 5,207 cases and 4,991 controls. Meta-analysis includes data from 11,319 cases and 15,854  
149 controls. Rates correspond to the average number of mutations per case/control. *P* values are 2-sided, odds ratios (OR) and 95% confidence  
150 intervals (CI) were generated from logistic regression models. In the targeted sequencing sample, *P* values that survive Bonferroni correction for  
151 multiple testing (6 tests) are in bold. LoF = loss of function, NSD = nonsynonymous damaging, NS = nonsynonymous, mut. = mutation, MAF =  
152 minor allele frequency.

153           Meta-analysis with two previously published case-control exome sequencing  
154   datasets (Sweden and UK10K, see methods for detail) strengthened the evidence for  
155   an increase in LoF mutations (frequency <0.1%) in cases (Table 1 and Supplementary  
156   Table S3). The additional support came entirely from the Swedish rather than the  
157   UK10K dataset (Sweden OR (95% CI) = 1.27 (1.08-1.51;  $P = 4.8 \times 10^{-3}$ ; UK10K OR  
158   (95% CI) = 0.95 (0.74-1.2);  $P = 0.66$ ). The results contributing to the meta-analysis  
159   are presented in Supplementary Table S3.

160           We partitioned the 187 genes into those intolerant of LoF mutation (pLi scores  
161   > 0.9 in nonpsych-ExAC data [16]) and those that are not intolerant (pLi ≤ 0.9). Meta-  
162   analysis of the case-control data showed association between schizophrenia and rare  
163   (frequency <0.1%) LoF mutations was driven by LoF intolerant genes (106 genes  
164   with pLi > 0.9: OR (95% CI) = 1.63 (1.33 – 2.0);  $P = 2.9 \times 10^{-6}$ . 81 genes with pLi ≤  
165   0.9: OR (95% CI) = 1.09 (0.95 – 1.24);  $P = 0.21$ ). The difference in effect size  
166   between pLi and non-pLi burden tests was significant (Z-test  $P = 0.0006$ ).

167

#### 168   Gene set analysis

169   In the targeted sequencing analysis, as only LoF mutations with a frequency <0.1%  
170   were significantly enriched in cases after correcting for multiple testing, we tested this  
171   class of mutation for gene set enrichment.

172           *ARC and NMDAR*: In the targeted sequencing sample, cases had a higher rate  
173   of LoF mutations (frequency <0.1%) in ARC and NMDAR sets (Fig 1). When meta-  
174   analysed with published case-control datasets, we found strong evidence that LoF  
175   mutations in NMDAR genes were associated with schizophrenia ( $P = 1.6 \times 10^{-4}$ , Fig 1  
176   and Supplementary Table S4), but weaker evidence for association with ARC genes  
177   ( $P = 0.047$ , Fig 1 and Supplementary Table S4).



To summarize the current status of RCVs in the above gene sets, we combined the case-control meta-analysis data with the *de novo* mutation data, selecting the class of *de novos* reported to be most strongly enriched in these gene sets (nonsynonymous *de novo* mutations in ARC and LoF *de novo* mutations NMDAR) in the previous work [9]. In the trio data, nonsynonymous and LoF *de novo* mutations were associated with ARC ( $P = 0.0015$ ) and NMDAR ( $P = 0.014$ ), respectively. Combining the *de novo* enrichment results with the case-control meta-analysis results (LoF, frequency  $< 0.1\%$ ), both ARC ( $P = 4.0 \times 10^{-4}$ ) and NMDAR ( $P = 1.7 \times 10^{-5}$ ) were associated with schizophrenia (Table 2).

The ARC and NMDAR complexes share 9 overlapping genes: when excluded from the analysis, we observed independent evidence for association with both gene sets (case-control-*de novo* meta-analysis: ARC  $P = 9.4 \times 10^{-4}$ ; NMDAR  $P = 7.4 \times 10^{-5}$ ).

**Table 2.** Synaptic gene set meta-analysis.

| Gene set<br>(N genes) | Case-Control<br>meta-analysis |                     |                     | <i>De novo</i><br>analysis | Case-control- <i>de novo</i><br>combined |
|-----------------------|-------------------------------|---------------------|---------------------|----------------------------|------------------------------------------|
|                       | N<br>(Rate)                   | <i>P</i><br>2-sided | OR<br>(95% CI)      | <i>P</i><br>(Obs/Exp)      | 1-side <i>P</i><br>(Fisher's combined)   |
| ARC<br>(28)           | 32/27<br>(0.0028/0.0017)      | 0.047               | 1.78<br>(1.01-3.13) | 0.0015<br>(7/1.64)         | $4.0 \times 10^{-4}$                     |
| NMDAR<br>(61)         | 114/111<br>(0.01/0.007)       | 0.00016             | 1.69<br>(1.29-2.21) | 0.014<br>(3/0.49)          | $1.7 \times 10^{-5}$                     |

The case-control meta-analysis tested LoF variants (frequency  $< 0.1\%$ ) for ARC and NMDAR in 11,319 schizophrenia cases and 15,854 controls. The *de novo* analysis tested nonsynonymous and LoF variants in ARC and NMDAR, respectively, in 1,136

196 schizophrenia trios. Full details of the analysis are presented in Supplementary Table  
197 S4.

198

199 *Voltage-gated sodium and calcium channels:* We found nominally significant  
200 evidence for enrichment in cases for LoF mutations ( $<0.1\%$  frequency) in voltage-  
201 gated sodium channels (targeted sequencing sample; OR (95% CI) = 1.99 (1.11-3.71);  
202  $P = 0.02$ ; case-control-*de novo* meta-analysis:  $P = 0.025$ , Supplementary Table S4),  
203 but no evidence for association between schizophrenia and voltage-gated calcium  
204 channels (Supplementary Table S4).

205 *Paralog conserved ion channel sites:* In the targeted sequence sample, we  
206 found a significant case excess of rare (frequency  $<0.1\%$ ) paralog conserved missense  
207 and LoF variants in sodium channels (OR (95% CI) = 1.26 (1.08 – 1.47);  $P = 0.0035$ )  
208 but not calcium channels (Supplementary Table S5). Enrichment of rare (frequency  
209  $<0.1\%$ ) paralog conserved missense and LoF variants was also supported in the full  
210 case-control meta-analysis (OR (95% CI) = 1.18 (1.07 – 1.31);  $P = 0.0014$ , Fig 2,  
211 Supplementary Table S5), and was robust to exclusion of LoF mutations from the  
212 analysis (OR (95% CI) = 1.16 (1.04 – 1.29);  $P = 0.007$ ). The effect size for rare  
213 (frequency  $<0.1\%$ ) paralog conserved missense and LoF variants was significantly  
214 different to that for paralog non-conserved missense variants (Z-test  $P = 0.0018$ ),  
215 indeed there was no enrichment for missense variants at paralog non-conserved sites  
216 (case-control meta-analysis  $P = 0.44$ , Fig 2, Supplementary Table S5).

217 We divided the voltage-gated sodium channel set into alpha (10 genes) and  
218 beta (4 genes) subunits, testing these separately; only the alpha subunits were  
219 significantly enriched for rare (frequency  $<0.1\%$ ) paralog conserved missense and  
220 LoF variants (Case-control meta-analysis: Alpha subunits; OR (95% CI) = 1.2 (1.08 –

1.33);  $P = 0.00086$ ; Beta subunits, OR (95% CI) = 0.92 (0.52 – 1.62);  $P = 0.76$ ). In all sodium channel genes, one nonsense *de novo* mutation was observed in *SCN2A* (*de novo*  $P$  value for LoF and paralog conserved missense variants in sodium channel alpha subunits = 0.75; case-control-*de novo* meta-analysis:  $P = 0.0029$ ).

Paralog conserved analysis did not find association with schizophrenia for individual voltage-gated sodium channel genes after correction for multiple testing (Supplementary Table S6).

### Single gene analysis

In the meta-analysis (LoF; frequency <0.1%) of all data, no gene was associated with schizophrenia after Bonferroni correction (given this analysis included exome sequence data used to select our gene targets, we corrected for ~20,000 genes, Supplementary Table S7). The most significant gene was *TAF13* ( $P = 1.6 \times 10^{-5}$ ), support coming mainly from published LoF *de novo* mutations as noted before [9] (Supplementary Table S7).

## **Discussion**

Sequencing studies have started to provide novel insights into the genetic architecture and aetiology of schizophrenia, although these are still limited by small sample sizes and low power. Seeking to increase power for a prioritized set of genes, we sequenced the coding regions of 187 schizophrenia candidates in over 10,000 samples that have not contributed to previous sequencing studies of schizophrenia.

Across all candidates, we found a significant excess of LoF alleles in the independent set of schizophrenia cases, confirming our hypothesis that one or more of

the candidates is involved in schizophrenia pathogenesis. The strongest evidence for enrichment was for LoF alleles with a frequency  $<0.1\%$ , suggesting that recurrent rather than only singleton schizophrenia risk alleles are present among our 187 targeted genes. This appears to contrast with a recent Swedish exome-sequencing study of schizophrenia, which reported an increased exome-wide burden in cases of ultra-rare protein altering alleles observed only once in their sample and never in 45,376 non-psychiatric ExAC individuals [7]. Our analyses (data not shown) of the same Swedish dataset confirms at an exome wide level, singleton LoF mutations to be more highly enriched than those with frequency  $<0.1\%$  (after excluding singletons; Z-test  $P = 0.00035$ ) although this did not hold when restricted to the 187 targeted genes (Z-test  $P = 0.11$ ).

In the present study, we conducted the largest schizophrenia sequencing meta-analysis of RCVs in the synaptic gene sets ARC and NMDAR to date. The inclusion of our new independent data in this analysis strengthened the evidence for association between RCVs in ARC and NMDAR and schizophrenia. In the context of previously published research, where rare and *de novo* CNVs in these gene sets have been consistently associated with schizophrenia [5, 10, 14], the results provide a strong body of evidence for the involvement of ARC and NMDAR proteins in the aetiology of schizophrenia.

Of the other two comprehensively tested functional candidate sets, only voltage-gated sodium channels were enriched for rare (frequency  $<0.1\%$ ) LoF alleles in cases and this was independently supported by a novel case-control analysis of missense variants at paralog conserved sites. The same voltage-gated sodium channel gene set was previously implicated in schizophrenia in an analysis of compound heterozygous mutation [18], a model that cannot be adequately tested in the present

dataset given the inability to phase very low frequency variation. In addition to previous genetic support in schizophrenia, we note sodium channels have high biological plausibility given that mutations in this gene set have been associated with other neurodevelopmental disorders, including some forms of epilepsy and developmental delay [20-22]. In the current study, no single sodium channel gene was significantly associated with schizophrenia (after correction for multiple testing), with the most significant gene being *SCN7A* ( $P_{uncorrected} = 0.0012$ ).

The sodium channel set contains 14 genes, 10 encoding alpha subunits involved in generating action potentials [21], and 4 beta subunits which, in association with alpha subunits, modulate their gating and cellular excitability [22]. In the present study, the evidence for association derives from mutations in alpha subunits, although the absence of signal in beta-subunits might simply reflect low power (there are fewer beta-subunits, of which paralog conservation scores are only available for *SCN2B* and *SCN4B*, whereas paralog conservation scores are available for all 10 alpha subunits).

Despite the increased sample size, we did not observe any single-gene association that remained statistically significant after correction for multiple testing. However, our gene set enrichment results suggest that significant single gene associations will be discovered when larger samples are combined with more effective methods for identifying disease-associated missense variation.

A limitation of our study was the exclusion of indel mutations (see methods) from the targeted sequencing. Also, given the restrictions posed by targeted sequencing, we were unable to test some of the much larger gene sets that have been implicated by common and rare variation in schizophrenia, for example targets of FMRP [4, 7, 9, 23].

296 In conclusion, we conducted one of the largest sequencing studies of  
 297 schizophrenia to date, which targeted the protein coding regions of 187 putative  
 298 schizophrenia risk genes. We found a significant excess of LoF alleles in cases among  
 299 all 187 targeted genes. By leveraging information from paralog conservation, we  
 300 provide novel evidence that multiple voltage-gated sodium channels are involved in  
 301 schizophrenia pathogenesis. We provide further support for association between  
 302 RCVs in ARC and NMDAR post-synaptic protein complexes and schizophrenia.  
 303 Larger samples are required to identify the specific genes and variants driving these  
 304 gene set associations.

305

## 306 **Methods**

307

### 308 Sample description

309 *Targeted sequence sample:* A total of 11,493 blood-derived DNA samples were  
 310 selected for targeted sequencing (5,724 cases and 5,769 controls). None have been  
 311 included in previous schizophrenia sequencing studies. The majority of sequenced  
 312 cases were from the CLOZUK dataset (n=4,647), which has been described  
 313 previously [24] and in the Supplementary Material. We sequenced additional cases  
 314 from the UK (Cardiff COGS cohort; n=521), Ireland (Dublin cohort; n=335) and the  
 315 Netherlands (GROUP cohort [25]; n=221). The majority of sequenced controls were  
 316 part of the WTCCC2 consortium (1958 birth cohort n=2,860, UK blood donors n =  
 317 2,463) [26-28]. Additional controls were sequenced from the Dublin (n= 230) and  
 318 GROUP cohorts (n=216) [25]. Sample descriptions are presented in the  
 319 supplementary material.

320           *Additional data sets:* We acquired publically available case-control exome  
321 sequencing data from two previously published schizophrenia studies, the UK10K  
322 Exome-sequencing study (N=1,352 cases and 4,769 controls) [11] and a Swedish  
323 study (N= 4,867 cases and 6,140 controls) [7]. Additionally, *de novo* mutations from  
324 1,136 published schizophrenia-proband parent trios were derived from our own and  
325 other published whole exome sequencing studies [9, 29-36] (Supplementary Material  
326 Table S8) .

327

### 328 Targeted Sequencing

329 We designed an Ampliseq custom panel (Thermo Fisher) for targeting the exons of  
330 187 genes. The panel comprised two pools of 3,094 and 3,082 amplicons each and  
331 covered a total region of 750kb. Library preparation used the Ion AmpliSeq protocol,  
332 using 10ng of DNA per pool, the Ion Ampliseq Kit Version 2.0 and the AmpliSeq  
333 custom panel (Thermo Fisher). We barcoded the libraries using the Ion Express  
334 Barcode Adapters 1-96 Kit (Thermo Fisher). Unamplified libraries were quantified by  
335 qPCR using Ion TQMN Quantitation kit following manufacturer's instructions  
336 (Thermo Fisher) and diluted to 100pM. Groups of 72 uniquely barcoded libraries  
337 were combined onto single Ion Chips. Sequencing was performed on the Ion Proton  
338 benchtop sequencing platform (Thermo Fisher) following the manufacturer's  
339 protocol. Sequencing took place in two waves, corresponding to different versions of  
340 the sequencing and chip kits: 2,305 cases and 2,274 controls were sequenced in wave  
341 1 using the Ion PI IC 200 kit and Ion PI Chip kit v2 BC (Thermo Fisher); 3,419 cases  
342 and 3,495 controls were sequenced in wave 2 using the Ion PI HiQ kit and Ion PI  
343 Chip kit v3 BC (Thermo Fisher). Data processing and QC procedures were conducted  
344 independently for each wave. The mean target coverage for cases and controls passing

QC was 158X and 160X for wave 1, and 154X and 145X for wave 2, respectively  
(density plots of sequence coverage in Supplementary Material Fig S1). Both cases  
and controls had at least 95% of target bases covered at  $\geq 10X$ .

### Gene-selection

We sequenced the coding regions of genes belonging to the following gene sets: ARC  
(n=28) [9], NMDAR (n=61) [9], voltage-gated calcium channels (n=26) [15] and  
voltage-gated sodium channels (n=14) [18]. We sequenced an additional 58 genes,  
selected for having two or more supportive lines of evidence for association with  
schizophrenia (full criteria for gene-selection described in Supplementary Material).  
A list of all 187 sequenced genes, and the rationale for selection is presented in  
Supplementary Table S1.

### Data processing and quality control

Sequence data were independently processed for each Ion Torrent wave according to  
GATK best practice guidelines [37, 38]. Reads were aligned to the human g1k (v37)  
reference genome using bwa [39]. Variants were called using GATK haplotype caller  
(v3.4) and filtered using the GATK Variant Quality Score Recalibration (VQSR) tool.

*Sample level QC:* Individuals were excluded if they were more than 3 standard  
deviations from their sequencing wave's mean for: proportion of variants in dbSNP;  
number of alternative alleles; number of singletons; total number of synonymous  
mutations; total number of nonsynonymous mutations. When available, SNP  
genotyping array data were used to assess sequencing-array genotype concordance  
(array genotypes used as truth set) and to identify duplicate/first degree relatives. SNP  
genotyping array data from 3 chips (Illumina OmniExpress, Illumina ExomeChip,



370 Immunochip) were available for 96% (5,508/5,724) of cases and 72% (4,149/5,769)  
 371 of controls. Samples were excluded if they had a genotype concordance  $< 0.9$  or if  
 372 they were found to be one member of a duplicate (kinship coefficient  $> 0.354$ ) or  
 373 first-degree relative (kinship coefficient  $> 0.177$ ) pair (identified using the KING  
 374 toolset [40] in the Bioconductor package SNPRelate). For samples not previously  
 375 genotyped using SNP arrays, we used Ion Torrent sequence data to identify and  
 376 exclude duplicate samples.

377 Principal component analysis (PCA) was used to identify and exclude cases  
 378 and controls with non-European ancestry. We performed PCA in the 1000 genomes  
 379 project data (phase 3), using variants found in both targeted sequence data and 1000  
 380 genomes data, and projected our targeted sequence samples onto these PCs using  
 381 EIGENSOFT smartPCA [41]. Targeted sequence samples were excluded if PCs 1 and  
 382 2 were more than 3 standard deviations from the mean of PCs from European 1000  
 383 genome samples (Supplementary Fig S2). Post sample QC, 5,207 cases and 4,991  
 384 controls from the targeted sequence sample were retained for analysis.

385 *Variant level QC:* Variant sites within each targeted Ion Torrent sequencing  
 386 wave were excluded if they failed Hardy-Weinberg equilibrium exact tests ( $\chi^2 P <$   
 387  $10^{-8}$ ), GATK VQSR filters, had  $> 20\%$  missingness, or contained an indel (sequence  
 388 data produced by Ion Torrent instruments has low indel specificity [42]). For targeted  
 389 sequencing data, individual genotypes were set to missing if they had a depth (DP)  $<$   
 390 20, genotype quality (GQ)  $< 80$ , allele-balance (AB)  $< 0.9$  for non-reference  
 391 homozygous genotypes or an AB  $< 0.2$  or  $> 0.8$  for heterozygous genotypes. For  
 392 analysis of previously published exome sequencing data, we applied filters which  
 393 more closely matched those described in their original publications (DP  $\leq 10$ , GQ  $<$   
 394 30, AB  $< 0.9$  for non-reference homozygous genotypes, AB  $< 0.2$  or  $> 0.8$  for

heterozygous genotypes) [7, 11]. All variant filtering was conducted using Hail software (<https://github.com/hail-is/hail>) [43].

### Variant annotation

In primary burden tests, we analysed three classes of mutation (LoF, nonsynonymous damaging, and nonsynonymous) and two allele frequency thresholds ( $<0.1\%$  and singletons). We defined LoF variants as those producing premature stop codons (nonsense) or situated at essential splice sites (within 2 bases either side of exon junctions). Damaging nonsynonymous mutations were defined as LoF alleles and missense alleles with PHRED-scaled CADD score  $\geq 20$  (representing the predicted top 1% most deleterious variants in the genome) [44]. For analysis of previously published case-control data (UK10K and Swedish samples), which were exome sequenced on Illumina instruments, we included frameshift indels as LoF mutations and frameshift/in-frame indels as nonsynonymous mutations. We annotated and filtered variants using the frequencies observed in their respective data set (Ion Torrent wave 1, Ion Torrent wave 2, UK10K or Swedish) and each ExAC sub-population (European (Non-Finnish), African, East Asian, European (Finnish), Latino, Other, South Asian) [16]. Singletons were annotated as alleles observed once in all available sequence data (targeted, UK10K and Swedish data) and never in 45,376 individuals without a known psychiatric diagnosis from the Exome Aggregation Consortium [16].

To annotate sites with their paralog conservation scores, we used para\_zscores downloaded from <https://zenodo.org/record/817898>. In our paralog conserved analysis, we followed the publication describing this metric [20] by testing the burden of all LoF alleles and missense alleles at sites annotated as having a para\_zscore  $> 0$ .

420 Variants were annotated using Hail's ensemble VEP method (version 86,  
421 <http://oct2016.archive.ensembl.org/index.html>).  
422  
423 Statistics  
424 **Case-control analysis:** Gene set and single gene association statistics were generated  
425 using the following Firth's penalised-likelihood logistic regression model.  
426  
427  $\text{Logit}(\text{pr}(\text{case})) \sim N \text{ test variants} + \text{baseline synonymous count} + \text{first 10 PCs} + \text{sex} +$   
428  $\text{Ion Torrent sequencing wave (targeted analysis only)}.$   
429  
430 N test variants refers to the number of putative risk alleles observed in each sample  
431 (e.g. number of LoF singletons in the gene/gene set tested). Baseline synonymous  
432 count refers to the number synonymous alleles observed in all sequenced genes, using  
433 the same allele frequency threshold used for the test variant (e.g., if LoF singletons  
434 are the test variant, then the overall number of synonymous singletons are corrected  
435 for). This covariate was only included in tests of nonsynonymous or LoF mutation to  
436 control for potential unknown technical biases [7].  
437  
438 Test statistics were generated independently for each case-control dataset  
439 (targeted, UK10K and Swedish), using the logistf function implemented in R (version  
440 3.3.1). Odds ratios (ORs) for the increased risk of schizophrenia incurred for each  
441 mutation were obtained from the Firth's penalised-likelihood logistic regression  
442 model described above.  
443  
444 **De novo mutation analysis:** Enrichment of *de novo* mutation in genes/gene sets was  
445 tested using the statistical framework described in Samocha *et al* 2014 [45]. Here,

gene mutation rates provided in Ware *et al* 2015 [46] were used to estimate the expected number of *de novo* mutations in the gene/gene set, which was then compared to the observed number of *de novo* mutations using a Poisson test (implemented in R). As gene mutation rates for in-frame indels are not provided in [46], we adopted the method used by the Deciphering Developmental Disorders Study [47], which scaled frameshift mutation rates by the ratio of in-frame to frameshift mutations reported to occur in genome-wide regions under weak negative selection (ratio 1:9) [47]. To estimate the expected number of LoF *de novo* mutations and missense *de novo* mutations at paralog conserved sites in sodium channel alpha subunits, we used the mutation rates provided in [20].

455

**Meta-analysis:** Coefficients and standard errors from independently analysed case-control (targeted, UK10K and Swedish) regression tests were meta-analysed as fixed effects using the inverse-variance method (implemented in R using the `rma.uni()` function as part of the `metafor` package). To obtain a single enrichment statistic for meta-analysed case-control and *de novo* tests, we followed the method described in [11], which combined a 1-tail case-control *P* value with the *de novo* Poisson test *P* value using Fisher's combined method. For our combined case-control-*de novo* meta-analysis of nonsynonymous damaging mutations, we included all *de novo* nonsynonymous mutations (i.e. not just those with a CADD score  $\geq 20$ ), given they are *a priori* more likely to be deleterious than inherited variation [48] and were the class of mutation most strongly associated with schizophrenia candidate genes in our previous publication [9].

468

**Acknowledgments**

470

471 The work at Cardiff University was primarily funded by Medical Research Council  
472 (MRC) Centre (MR/L010305/1) and Program (G0800509) Grants Additional support  
473 was provided from the European Community's Seventh Framework Programme  
474 HEALTH-F2-2010-241909 (Project EU-GEI) and the European Union's Seventh  
475 Framework Programme for research, technological development and demonstration  
476 under grant agreement n° 279227 (CRESTAR Consortium).

477 We thank the participants and clinicians who took part in the CardiffCOGS  
478 study. For the CLOZUK2 sample we thank Leyden Delta for supporting the sample  
479 collection, anonymisation and data preparation (particularly Marinka Helthuis, John  
480 Jansen, Karel Jollie and Anouschka Colson), Magna Laboratories, UK (Andy Walker)  
481 and, for CLOZUK1, Novartis and The Doctor's Laboratory staff for their guidance  
482 and cooperation.

483 We acknowledge Kiran Mantripragada, Lesley Bates and Lucinda Hopkins, at  
484 Cardiff University, for laboratory sample management. We acknowledge Wayne  
485 Lawrence and Mark Einon, at Cardiff University, for support with the use and setup  
486 of computational infrastructures. We acknowledge Tarjinder Singh, Jeffrey Barrett,  
487 and other members of the UK10K consortium (<https://www.uk10k.org/>) [11].

488

#### 489 GROUP acknowledgments

490 GROUP investigators are: Behrooz Z. Alizadeh<sup>a</sup>, Therese van Amelsvoort<sup>g</sup>, Agna A.  
491 Bartels-Velthuis<sup>a</sup>, Nico J. van Beveren<sup>b,c,d</sup>, Richard Bruggeman<sup>a</sup>, Wiepke Cahn<sup>e</sup>,  
492 Lieuwe de Haan<sup>f</sup>, Philippe Delespaul<sup>g</sup>, Carin J. Meijer<sup>f</sup>, Inez Myin-Germeys<sup>h</sup>, Rene S.  
493 Kahn<sup>e</sup>, Frederike Schirmbeck<sup>f</sup>, Claudia J.P. Simons<sup>g,i</sup>, Neeltje E. van Haren<sup>e</sup>, Jim van  
494 Os<sup>g,j</sup>, Ruud van Winkel<sup>g,h</sup>, Jurjen J. Luykx<sup>c,k,l,m</sup>

495

496 <sup>a</sup> University of Groningen, University Medical Center Groningen, University Center  
497 for Psychiatry, Groningen, The Netherlands;

498 <sup>b</sup> Antes Center for Mental Health Care, Rotterdam, The Netherlands;

499 <sup>c</sup> Erasmus MC, Department of Psychiatry, Rotterdam, The Netherlands;

500 <sup>d</sup> Erasmus MC, Department of Neuroscience, Rotterdam, The Netherlands;

501 <sup>e</sup> University Medical Center Utrecht, Department of Psychiatry, Brain Centre Rudolf  
502 Magnus, Utrecht, The Netherlands;

503 <sup>f</sup> Academic Medical Center, University of Amsterdam, Department of Psychiatry,  
504 Amsterdam, The Netherlands;

505 <sup>g</sup> Maastricht University Medical Center, Department of Psychiatry and Psychology,  
506 School for Mental Health and Neuroscience, Maastricht, The Netherlands;

507 <sup>h</sup> KU Leuven, Department of Neuroscience, Research Group Psychiatry, Center for  
508 Contextual Psychiatry, Leuven, Belgium;

509 <sup>i</sup> GGzE, Institute for Mental Health Care Eindhoven and De Kempen, Eindhoven, The  
510 Netherlands;

511 <sup>j</sup> King's College London, King's Health Partners, Department of Psychosis Studies,  
512 Institute of Psychiatry, London, United Kingdom;

513 <sup>k</sup> University Medical Center Utrecht, Department of Translational Neuroscience,  
514 Brain Centre Rudolf Magnus, Utrecht, The Netherlands;

515 <sup>l</sup> Department of Psychiatry, ZNA Hospitals, Antwerp, Belgium;

516 <sup>m</sup> SymforaMeander hospital, medical-psychiatric unit, Amersfoort, the Netherlands

517

518

519

The infrastructure for the GROUP study is funded through the Geestkracht programme of the Dutch Health Research Council (Zon-Mw, grant number 10-000-1001), and matching funds from participating pharmaceutical companies (Lundbeck, AstraZeneca, Eli Lilly, Janssen Cilag) and universities and mental health care organizations (Amsterdam: Academic Psychiatric Centre of the Academic Medical Center and the mental health institutions: GGZ Ingeest, Arkin, Dijk en Duin, GGZ Rivierduinen, Erasmus Medical Centre, GGZ Noord Holland Noord. Groningen: University Medical Center Groningen and the mental health institutions: Lentis, GGZ Friesland, GGZ Drenthe, Dimence, Mediant, GGNet Warnsveld, Yulius Dordrecht and Parnassia psycho-medical center The Hague. Maastricht: Maastricht University Medical Centre and the mental health institutions: GGZ Eindhoven en De Kempen, GGZ Breburg, GGZ Oost-Brabant, Vincent van Gogh voor Geestelijke Gezondheid, Mondriaan, Virenze riagg, Zuyderland GGZ, MET ggz, Universitair Centrum Sint-Jozef Kortenberg, CAPRI University of Antwerp, PC Ziekeren Sint-Truiden, PZ Sancta Maria Sint-Truiden, GGZ Overpelt, OPZ Rekem. Utrecht: University Medical Center Utrecht and the mental health institutions Altrecht, GGZ Centraal and Delta.)

We are grateful for the generosity of time and effort by the patients, their families and healthy subjects. Furthermore we would like to thank all research personnel involved in the GROUP project, in particular: Joyce van Baaren, Erwin Veermans, Ger Driessen, Truda Driesen, Karin Pos, Erna van 't Hag, Jessica de Nijs, Atiqul Islam, Wendy Beuken and Debora Op 't Eijnde.

542 **References**

1. Sullivan PF, Daly MJ, O'Donovan M. Genetic architectures of psychiatric disorders: the emerging picture and its implications. *Nat Rev Genet.* 2012;13(8):537-51.
2. Lee SH, DeCandia TR, Ripke S, Yang J, PGC-SCZ, ISC, et al. Estimating the proportion of variation in susceptibility to schizophrenia captured by common SNPs. *Nat Genet.* 2012;44(3):247-50.
3. Ripke S, O'Dushlaine C, Chambert K, Moran JL, Kahler AK, Akterin S, et al. Genome-wide association analysis identifies 13 new risk loci for schizophrenia. *Nat Genet.* 2013;45(10):1150-9. doi: 10.1038/ng.2742  
<http://www.nature.com/ng/journal/vaop/ncurrent/abs/ng.2742.html> - supplementary-information.
4. Pardiñas AF, Holmans P, Pocklington AJ, Escott-Price V, Ripke S, Carrera N, et al. Common schizophrenia alleles are enriched in mutation-intolerant genes and in regions under strong background selection. *Nat Genet.* 2017;In press. doi: 10.1101/068593.
5. CNV and Schizophrenia Working Groups of the Psychiatric Genomics C. Contribution of copy number variants to schizophrenia from a genome-wide study of 41,321 subjects. *Nat Genet.* 2017;49(1):27-35. doi: 10.1038/ng.3725  
<http://www.nature.com/ng/journal/v49/n1/abs/ng.3725.html> - supplementary-information.
6. Rees E, Kendall K, Pardiñas AF, Legge SE, Pocklington A, Escott-Price V, et al. Analysis of intellectual disability copy number variants for association with schizophrenia. *JAMA Psychiatry.* 2016;73(9):963-9. doi: 10.1001/jamapsychiatry.2016.1831.
7. Genovese G, Fromer M, Stahl EA, Ruderfer DM, Chambert K, Landen M, et al. Increased burden of ultra-rare protein-altering variants among 4,877 individuals with schizophrenia. *Nat Neurosci.* 2016;advance online publication. doi: 10.1038/nn.4402  
<http://www.nature.com/neuro/journal/vaop/ncurrent/abs/nn.4402.html> - supplementary-information.
8. Purcell S, Cherny SS, Sham PC. Genetic Power Calculator: design of linkage and association genetic mapping studies of complex traits. *Bioinformatics.* 2003;19(1):149-50. doi: 10.1093/bioinformatics/19.1.149.
9. Fromer M, Pocklington AJ, Kavanagh DH, Williams HJ, Dwyer S, Gormley P, et al. De novo mutations in schizophrenia implicate synaptic networks. *Nature.* 2014;506:179-84.
10. Kirov G, Pocklington AJ, Holmans P, Ivanov D, Ikeda M, Ruderfer D, et al. De novo CNV analysis implicates specific abnormalities of postsynaptic signalling complexes in the pathogenesis of schizophrenia. *Mol Psychiatry.* 2012;17(2):142-53.
11. Singh T, Kurki MI, Curtis D, Purcell SM, Crooks L, McRae J, et al. Rare loss-of-function variants in SETD1A are associated with schizophrenia and developmental disorders. *Nat Neurosci.* 2016;19(4):571-7. doi: 10.1038/nn.4267  
<http://www.nature.com/neuro/journal/v19/n4/abs/nn.4267.html> - supplementary-information.
12. Steinberg S, Gudmundsdottir S, Sveinbjornsson G, Suvisaari J, Paunio T, Torniainen-Holm M, et al. Truncating mutations in RBM12 are associated with psychosis. *Nat Genet.* 2017;49(8):1251-4. doi: 10.1038/ng.3894



- 593 <http://www.nature.com/ng/journal/v49/n8/abs/ng.3894.html> - supplementary-
- 594 [information.](#)
- 595 13. Kiezun A, Garimella K, Do R, Stitzel NO, Neale BM, McLaren PJ, et al.
- 596 Exome sequencing and the genetic basis of complex traits. *Nat Genet.*
- 597 2012;44(6):623-30.
- 598 14. Pocklington Andrew J, Rees E, Walters James TR, Han J, Kavanagh
- 599 David H, Chambert Kimberly D, et al. Novel Findings from CNVs Implicate
- 600 Inhibitory and Excitatory Signaling Complexes in Schizophrenia. *Neuron.*
- 601 2015;86(5):1203-14. doi: <http://dx.doi.org/10.1016/j.neuron.2015.04.022>.
- 602 15. Purcell SM, Moran JL, Fromer M, Ruderfer D, Solovieff N, Roussos P, et al.
- 603 A polygenic burden of rare disruptive mutations in schizophrenia. *Nature.*
- 604 2014;506:185-90.
- 605 16. Lek M, Karczewski KJ, Minikel EV, Samocha KE, Banks E, Fennell T, et al.
- 606 Analysis of protein-coding genetic variation in 60,706 humans. *Nature.*
- 607 2016;536(7616):285-91. doi: 10.1038/nature19057
- 608 <http://www.nature.com/nature/journal/v536/n7616/abs/nature19057.html> -
- 609 [supplementary-information.](#)
- 610 17. Singh T, Walters JTR, Johnstone M, Curtis D, Suvisaari J, Torniainen M, et
- 611 al. The contribution of rare variants to risk of schizophrenia in individuals with
- 612 and without intellectual disability. *Nat Genet.* 2017;advance online publication.
- 613 doi: 10.1038/ng.3903
- 614 <http://www.nature.com/ng/journal/vaop/ncurrent/abs/ng.3903.html> - supplementary-
- 615 [information.](#)
- 616 18. Rees E, Kirov G, Walters JT, Richards AL, Howrigan D, Kavanagh DH, et al.
- 617 Analysis of exome sequence in 604 trios for recessive genotypes in
- 618 schizophrenia. *Transl Psychiatry.* 2015;5:e607. doi: 10.1038/tp.2015.99.
- 619 19. Schizophrenia Working Group of the Psychiatric Genomics Consortium.
- 620 Biological insights from 108 schizophrenia-associated genetic loci. *Nature.*
- 621 2014;511(7510):421-7.
- 622 20. Lal D, May P, Samocha K, Kosmicki J, Robinson EB, Moller R, et al. Gene
- 623 family information facilitates variant interpretation and identification of disease-
- 624 associated genes. *bioRxiv.* 2017. doi: 10.1101/159780.
- 625 21. Eijkelkamp N, Linley JE, Baker MD, Minett MS, Clegg R, Werdehausen R, et
- 626 al. Neurological perspectives on voltage-gated sodium channels. *Brain.*
- 627 2012;135(9):2585-612. doi: 10.1093/brain/aww225.
- 628 22. Hull JM, Isom LL. Voltage-gated sodium channel  $\beta$  subunits: The power
- 629 outside the pore in brain development and disease. *Neuropharmacology.* 2017.
- 630 doi: <https://doi.org/10.1016/j.neuropharm.2017.09.018>.
- 631 23. Leonenko G, Richards AL, Walters JT, Pocklington A, Chambert K, Al Eissa
- 632 MM, et al. Mutation intolerant genes and targets of FMRP are enriched for
- 633 nonsynonymous alleles in schizophrenia. *Am J Med Genet B Neuropsychiatr*
- 634 *Genet.* 2017;174(7):724-31. doi: 10.1002/ajmg.b.32560. PubMed PMID:
- 635 PMC5669020.
- 636 24. Rees E, Walters JTR, Georgieva L, Isles AR, Chambert KD, Richards AL, et
- 637 al. Analysis of copy number variations at 15 schizophrenia-associated loci. *Br J*
- 638 *Psychiatry.* 2014;204(2):108-14.
- 639 25. Korver N, Quee PJ, Boos HBM, Simons CJP, de Haan L, investigators G.
- 640 Genetic Risk and Outcome of Psychosis (GROUP), a multi site longitudinal cohort
- 641 study focused on gene-environment interaction: objectives, sample

characteristics, recruitment and assessment methods. *Int J Methods Psychiatr Res.* 2012;21(3):205-21. doi: 10.1002/mpr.1352.

26. Power C, Atherton K, Strachan DP, Shepherd P, Fuller E, Davis A, et al. Life-course influences on health in British adults: effects of socio-economic position in childhood and adulthood. *Int J Epidemiol.* 2007;36(3):532-9. doi: 10.1093/ije/dyl310.

27. Power C, Elliott J. Cohort profile: 1958 British birth cohort (National Child Development Study). *Int J Epidemiol.* 2006;35(1):34-41. doi: 10.1093/ije/dyi183.

28. Wellcome Trust Case Control Consortium. Genome-wide association study of 14,000 cases of seven common diseases and 3,000 shared controls. *Nature.* 2007;447(7145):661-78.

29. Ambalavanan A, Girard SL, Ahn K, Zhou S, Dionne-Laporte A, Spiegelman D, et al. De novo variants in sporadic cases of childhood onset schizophrenia. *Eur J Hum Genet.* 2016;24(6):944-8. doi: 10.1038/ejhg.2015.218.

30. Girard SL, Gauthier J, Noreau A, Xiong L, Zhou S, Jouan L, et al. Increased exonic de novo mutation rate in individuals with schizophrenia. *Nat Genet.* 2011;43(9):860-3. doi: <http://www.nature.com/ng/journal/v43/n9/abs/ng.886.html - supplementary-information>.

31. Guipponi M, Santoni FA, Setola V, Gehrig C, Rotharmel M, Cuenca M, et al. Exome Sequencing in 53 Sporadic Cases of Schizophrenia Identifies 18 Putative Candidate Genes. *PLoS ONE.* 2014;9(11):e112745. doi: 10.1371/journal.pone.0112745.

32. Gulsuner S, Walsh T, Watts AC, Lee MK, Thornton AM, Casadei S, et al. Spatial and temporal mapping of de novo mutations in schizophrenia to a fetal prefrontal cortical network. *Cell.* 2013;154(3):518-29.

33. McCarthy S, Gillis J, Kramer M, Lihm J, Yoon S, Berstein Y, et al. De novo mutations in schizophrenia implicate chromatin remodeling and support a genetic overlap with autism and intellectual disability. *Mol psychiatry.* 2014;19(6):652-8.

34. Takata A, Xu B, Ionita-Laza I, Roos JL, Gogos Joseph A, Karayiorgou M. Loss-of-Function Variants in Schizophrenia Risk and SETD1A as a Candidate Susceptibility Gene. *Neuron.* 2014;82(4):773-80. doi: <http://dx.doi.org/10.1016/j.neuron.2014.04.043>.

35. Wang Q, Li M, Yang Z, Hu X, Wu H-M, Ni P, et al. Increased co-expression of genes harboring the damaging de novo mutations in Chinese schizophrenic patients during prenatal development. *Sci Rep.* 2015;5:18209. doi: 10.1038/srep18209

<http://www.nature.com/articles/srep18209 - supplementary-information>.

36. Xu B, Ionita-Laza I, Roos JL, Boone B, Woodrick S, Sun Y, et al. De novo gene mutations highlight patterns of genetic and neural complexity in schizophrenia. *Nat Genet.* 2012;44(12):1365-9. doi: <http://www.nature.com/ng/journal/v44/n12/abs/ng.2446.html - supplementary-information>.

37. McKenna A, Hanna M, Banks E, Sivachenko A, Cibulskis K, Kernysky A, et al. The Genome Analysis Toolkit: A MapReduce framework for analyzing next-generation DNA sequencing data. *Genome Res.* 2010;20(9):1297-303. doi: 10.1101/gr.107524.110.

38. DePristo MA, Banks E, Poplin R, Garimella KV, Maguire JR, Hartl C, et al. A framework for variation discovery and genotyping using next-generation DNA sequencing data. *Nat Genet.* 2011;43(5):491-8. doi: <http://www.nature.com/ng/journal/v43/n5/abs/ng.806.html> - supplementary-information.
39. Li H, Durbin R. Fast and accurate short read alignment with Burrows-Wheeler transform. *Bioinformatics.* 2009;25(14):1754-60. doi: 10.1093/bioinformatics/btp324.
40. Manichaikul A, Mychaleckyj JC, Rich SS, Daly K, Sale M, Chen W-M. Robust relationship inference in genome-wide association studies. *Bioinformatics.* 2010;26(22):2867-73. doi: 10.1093/bioinformatics/btq559.
41. Patterson N, Price AL, Reich D. Population Structure and Eigenanalysis. *PLOS Genetics.* 2006;2(12):e190. doi: 10.1371/journal.pgen.0020190.
42. Zhang G, Wang J, Yang J, Li W, Deng Y, Li J, et al. Comparison and evaluation of two exome capture kits and sequencing platforms for variant calling. *BMC Genomics.* 2015;16(1):581. doi: 10.1186/s12864-015-1796-6.
43. Ganna A, Genovese G, Howrigan DP, Byrnes A, Kurki MI, Zekavat SM, et al. Ultra-rare disruptive and damaging mutations influence educational attainment in the general population. *Nat Neurosci.* 2016;19:1563. doi: 10.1038/nn.4404 <https://www.nature.com/articles/nn.4404> - supplementary-information.
44. Kircher M, Witten DM, Jain P, O'Roak BJ, Cooper GM, Shendure J. A general framework for estimating the relative pathogenicity of human genetic variants. *Nat Genet.* 2014;46(3):310-5. doi: 10.1038/ng.2892 <http://www.nature.com/ng/journal/v46/n3/abs/ng.2892.html> - supplementary-information.
45. Samocha KE, Robinson EB, Sanders SJ, Stevens C, Sabo A, McGrath LM, et al. A framework for the interpretation of de novo mutation in human disease. *Nat Genet.* 2014;46(9):944-50. doi: 10.1038/ng.3050. PubMed PMID: PMC4222185.
46. Ware JS, Samocha KE, Homsy J, Daly MJ. Interpreting de novo Variation in Human Disease Using denovolyzeR. *Curr Protoc Hum Genet.* 2015;87:7.25.1-7.25.15. doi: 10.1002/0471142905.hg0725s87.
47. The Deciphering Developmental Disorders S. Large-scale discovery of novel genetic causes of developmental disorders. *Nature.* 2015;519(7542):223-8. doi: 10.1038/nature14135 <http://www.nature.com/nature/journal/v519/n7542/abs/nature14135.html> - supplementary-information.
48. Veltman JA, Brunner HG. De novo mutations in human genetic disease. *Nat Rev Genet.* 2012;13(8):565-75.

## Supporting Information Captions

**Table S1.** Genes targeted for sequencing. Gene IDs are presented for all 187 targeted genes, along with the criteria used to select them for sequencing.

734

735 **Table S2.** Targeted sequence sample case-control LoF mutations. All loss of function

736 (LoF) mutations observed in new targeted sequence data, for alleles < 0.1% in

737 frequency. Singletons are indicated in the Is\_Singleton column.

738

739 **Table S3.** Total-burden analysis. Case-control association results for all 187 targeted

740 genes and 106 LoF intolerant genes (genes with pLi scores > 0.9). Results for variants

741 with a frequency < 0.1% are shown in tab 1, and for singleton variants in tab 2.

742

743 **Table S4.** Primary gene-set analysis. Gene set association results for all three case-

744 control datasets (Targeted sequence sample, Swedish, UK10K) and case-control-*de*

745 *novo* meta-analysis (Fisher's combined method). Results for variants with a frequency

746 < 0.1% are shown in tab 1, and for singleton variants in tab 2.

747

748 **Table S5.** Ion Channel gene set analysis of LoF and paralog conserved missense

749 variants (<0.1% frequency). Paralog conservation scores (para\_zscores)

750 were downloaded from <https://zenodo.org/record/817898>.

751

752 **Table S6.** Single-gene meta-analysis of sodium channel genes for LoF and

753 paralog conserved missense variants (<0.1% frequency).

754

755 **Table S7.** Primary single-gene meta-analysis of LoF variants (<0.1% frequency).

756 Single-gene results for all three case-control (Targeted sequencing, Swedish, UK10K)

757 and *de novo* mutations.

758

## Figure Captions

**Fig 1.** Case-control analysis of rare (frequency <0.1%) loss of function mutations in synaptic gene sets ARC and NMDAR.

**Fig 2.** Case-control meta-analysis of rare (frequency <0.1%) variants in voltage-gated sodium channels. S = synonymous; NS = nonsynonymous; NDS = nonsynonymous damaging; LoF = loss-of-function.

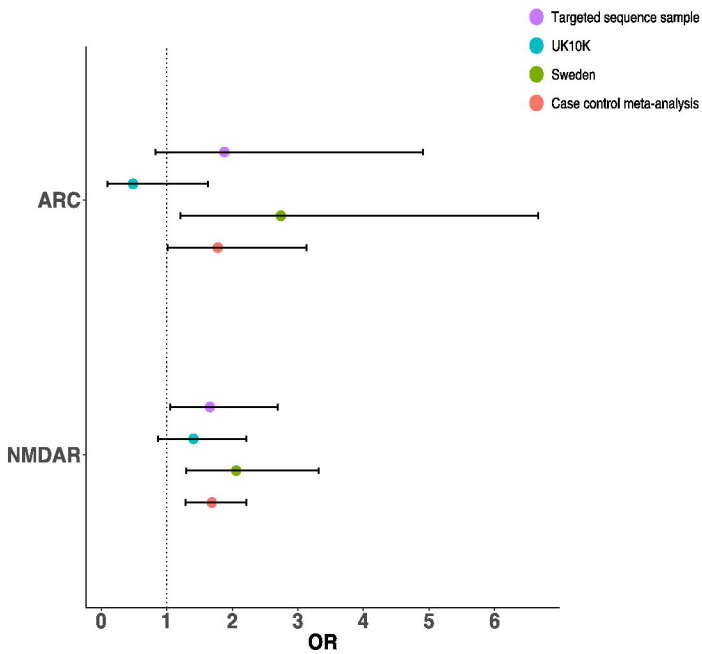

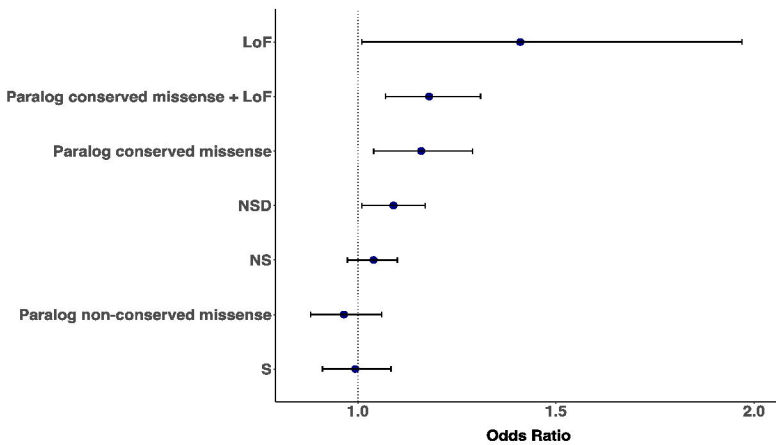

Source: http://biorxiv.org/content/10.1101/246850v1.full.pdf
